# Supplementary material for: Identification and Characterisation of Nontuberculous Mycobacteria in African Buffaloes (Syncerus caffer), South Africa
Source: MDPI journal article supplement (doi:10.3390/microorganisms10091861), 2022-09-17
Supplement: s1 [file s1]

Table S1: Number of sequence matches for each mycobacterial species identified in African buffalo oronasal swab cultures using *hsp 65* and *rpoB* PCR and Sanger sequencing.

| Species                    | Total # of matches |
|----------------------------|--------------------|
| <i>M. avium</i>            | 19                 |
| <i>M. intracellulare</i>   | 16                 |
| <i>M. colombiense</i>      | 14                 |
| <i>M. komanii</i>          | 11                 |
| <i>M. novocastrense</i>    | 9                  |
| <i>M. bouchedurhonense</i> | 8                  |
| <i>M. flavescens</i>       | 8                  |
| <i>M. lehmannii</i>        | 6                  |
| <i>M. rutilum</i>          | 6                  |
| <i>M. kansasii</i>         | 3                  |
| <i>M. neumannii</i>        | 3                  |
| <i>M. phlei</i>            | 3                  |
| <i>M. psychrotolerans</i>  | 3                  |
| <i>M. vulneris</i>         | 3                  |
| <i>M. arosiense</i>        | 2                  |
| <i>M. fortuitum</i>        | 2                  |
| <i>M. kyorinense</i>       | 2                  |
| <i>M. lacus</i>            | 2                  |
| <i>M. lentiflavum</i>      | 2                  |
| <i>M. mantenii</i>         | 2                  |
| <i>M. marseillense</i>     | 2                  |
| <i>M. timonense</i>        | 2                  |
| <i>M. tuberculosis*</i>    | 2                  |
| <i>M. abscessus</i>        | 1                  |
| <i>M. arupense</i>         | 1                  |
| <i>M. asiaticum</i>        | 1                  |
| <i>M. branderi</i>         | 1                  |
| <i>M. celeriflavum</i>     | 1                  |
| <i>M. chlorophenolicum</i> | 1                  |
| <i>M. chubuense</i>        | 1                  |
| <i>M. conceptionense</i>   | 1                  |
| <i>M. crocinum</i>         | 1                  |
| <i>M. diernhoferi</i>      | 1                  |
| <i>M. elephantis</i>       | 1                  |
| <i>M. fukienense</i>       | 1                  |
| <i>M. goodii</i>           | 1                  |
| <i>M. gordonae</i>         | 1                  |
| <i>M. hackensackense</i>   | 1                  |
| <i>M. kubicae</i>          | 1                  |
| <i>M. lepromatosis</i>     | 1                  |
| <i>M. liflandii</i>        | 1                  |
| <i>M. malmesburyense</i>   | 1                  |
| <i>M. massiliense</i>      | 1                  |
| <i>M. orygis*</i>          | 1                  |
| <i>M. paragordonae</i>     | 1                  |
| <i>M. paraterrae</i>       | 1                  |
| <i>M. parmense</i>         | 1                  |

|                                 |   |
|---------------------------------|---|
| <b><i>M. pyrenivorans</i></b>   | 1 |
| <b><i>M. rufum</i></b>          | 1 |
| <b><i>M. saopaulense</i></b>    | 1 |
| <b><i>M. shottsii</i></b>       | 1 |
| <b><i>M. smegmatis</i></b>      | 1 |
| <b><i>M. szulgai</i></b>        | 1 |
| <b><i>M. tusciae</i></b>        | 1 |
| <b><i>M. ulcerans</i></b>       | 1 |
| <b><i>M. vicinigordonae</i></b> | 1 |
| <b><i>M. virginense</i></b>     | 1 |

\* MTBC members were identified by *hsp* 65 or *rpoB* amplification, but RD PCR (Warren et al 2001) showed that mycobacteria in the cultures were not MTBC members

Table S2: Mycobacterial species matches (sequence identity  $\geq 90\%$ ) in African buffalo oronasal swab cultures, as determined by *hsp* 65 and *rpoB* PCRs and Sanger sequencing. Presence or absence of *esat*-6 or *cfp*-10 in the cultures are indicated.

| Animal ID | Mycobacterial species                                                                                                                                                                                                                                                                                                                                        | <i>esat</i> -6/ <i>cfp</i> -10 |
|-----------|--------------------------------------------------------------------------------------------------------------------------------------------------------------------------------------------------------------------------------------------------------------------------------------------------------------------------------------------------------------|--------------------------------|
| S24       | <i>M. flavescens</i> ; <i>M. komanii</i> ; <i>M. novocastrense</i> ; <i>M. phlei</i> ; <i>M. rutilum</i>                                                                                                                                                                                                                                                     | Positive                       |
| S23       | <i>M. avium</i> ; <i>M. colombiense</i> ; <i>M. intracellulare</i>                                                                                                                                                                                                                                                                                           | Negative                       |
| S26       | <i>M. avium</i> ; <i>M. colombiense</i> ; <i>M. intracellulare</i>                                                                                                                                                                                                                                                                                           | Positive                       |
| S18       | <i>M. flavescens</i> ; <i>M. komanii</i> ; <i>M. novocastrense</i> ; <i>M. phlei</i> ; <i>M. rutilum</i>                                                                                                                                                                                                                                                     | Positive                       |
| S21       | <i>M. avium</i> ; <i>M. colombiense</i> ; <i>M. intracellulare</i>                                                                                                                                                                                                                                                                                           | Positive                       |
| S22       | <i>M. arosiense</i> ; <i>M. avium</i> ; <i>M. bouchedurhonense</i> ; <i>M. colombiense</i> ; <i>M. mantenii</i>                                                                                                                                                                                                                                              | Negative                       |
| S31       | <i>M. avium</i> ; <i>M. colombiense</i>                                                                                                                                                                                                                                                                                                                      | Positive                       |
| S47       | <i>M. avium</i> ; <i>M. crocinum</i> ; <i>M. fortuitum</i> ; <i>M. goodii</i> ; <i>M. intracellulare</i> ; <i>M. lentiflavum</i> ; <i>M. lepromatosis</i> ; <i>M. liflandii</i> ; <i>M. orygis</i> *; <i>M. paraterrae</i> ; <i>M. rufum</i> ; <i>M. shottsii</i> ; <i>M. smegmatis</i> ; <i>M. tuberculosis</i> *; <i>M. ulcerans</i> ; <i>M. virginiae</i> | Positive                       |
| S55       | <i>M. avium</i> ; <i>M. intracellulare</i> ; <i>M. kansasii</i> ; <i>M. kyorinense</i> ; <i>M. lacus</i>                                                                                                                                                                                                                                                     | Negative                       |
| S3        | <i>M. flavescens</i> ; <i>M. komanii</i> ; <i>M. lehmannii</i> ; <i>M. novocastrense</i> ; <i>M. psychrotolerans</i>                                                                                                                                                                                                                                         | Negative                       |
| S8        | <i>M. avium</i> ; <i>M. bouchedurhonense</i> ; <i>M. colombiense</i> ; <i>M. intracellulare</i> ; <i>M. vulneris</i>                                                                                                                                                                                                                                         | Negative                       |
| S10       | <i>M. avium</i> ; <i>M. colombiense</i> ; <i>M. intracellulare</i> ; <i>M. kubicae</i> ; <i>M. parmense</i>                                                                                                                                                                                                                                                  | Negative                       |
| S11       | <i>M. avium</i> ; <i>M. bouchedurhonense</i> ; <i>M. colombiense</i>                                                                                                                                                                                                                                                                                         | Negative                       |
| S38       | <i>M. komanii</i> ; <i>M. lehmannii</i> ; <i>M. novocastrense</i> ; <i>M. pyrenivorans</i> ; <i>M. rutilum</i>                                                                                                                                                                                                                                               | Positive                       |
| S39       | <i>M. abscessus</i> ; <i>M. conceptionense</i> ; <i>M. fukienense</i> ; <i>M. massiliense</i> ; <i>M. saopaulense</i>                                                                                                                                                                                                                                        | Positive                       |
| S40       | <i>M. komanii</i> ; <i>M. lehmannii</i> ; <i>M. novocastrense</i> ; <i>M. rutilum</i> ; <i>M. tusciae</i>                                                                                                                                                                                                                                                    | Negative                       |
| S79       | <i>M. flavescens</i> ; <i>M. komanii</i> ; <i>M. malmesburyense</i> ; <i>M. novocastrense</i> ; <i>M. phlei</i>                                                                                                                                                                                                                                              | Negative                       |
| S80       | <i>M. avium</i> ; <i>M. bouchedurhonense</i> ; <i>M. colombiense</i> ; <i>M. intracellulare</i> ; <i>M. vulneris</i>                                                                                                                                                                                                                                         | Positive                       |
| S84       | <i>M. fortuitum</i>                                                                                                                                                                                                                                                                                                                                          | Negative                       |
| S83       | <i>M. arupense</i> ; <i>M. avium</i> ; <i>M. celeriflavum</i> ; <i>M. colombiense</i> ; <i>M. komanii</i>                                                                                                                                                                                                                                                    | Positive                       |
| S86       | <i>M. arosiense</i> ; <i>M. avium</i> ; <i>M. bouchedurhonense</i> ; <i>M. colombiense</i> ; <i>M. mantenii</i>                                                                                                                                                                                                                                              | Positive                       |
| S61       | <i>M. diernhoferi</i> ; <i>M. hackensackense</i>                                                                                                                                                                                                                                                                                                             | Positive                       |
| S64       | <i>M. avium</i> ; <i>M. intracellulare</i> ; <i>M. marseillense</i>                                                                                                                                                                                                                                                                                          | Negative                       |
| S65       | <i>M. avium</i> ; <i>M. bouchedurhonense</i> ; <i>M. colombiense</i> ; <i>M. intracellulare</i>                                                                                                                                                                                                                                                              | Negative                       |
| S69       | <i>M. komanii</i> ; <i>M. psychrotolerans</i> ; <i>M. rutilum</i>                                                                                                                                                                                                                                                                                            | Negative                       |
| S118      | <i>M. avium</i> ; <i>M. bouchedurhonense</i> ; <i>M. colombiense</i> ; <i>M. intracellulare</i>                                                                                                                                                                                                                                                              | Positive                       |
| S94       | <i>M. elephantis</i> ; <i>M. flavescens</i> ; <i>M. lehmannii</i> ; <i>M. neumannii</i> ; <i>M. novocastrense</i>                                                                                                                                                                                                                                            | Positive                       |
| S102      | <i>M. intracellulare</i>                                                                                                                                                                                                                                                                                                                                     | Positive                       |
| S103      | <i>M. intracellulare</i> ; <i>M. timonense</i>                                                                                                                                                                                                                                                                                                               | Negative                       |
| S89       | <i>M. asiaticum</i> ; <i>M. gordonae</i> ; <i>M. lentiflavum</i> ; <i>M. paragordonae</i> ; <i>M. vicinigordonae</i>                                                                                                                                                                                                                                         | Positive                       |
| S111      | <i>M. avium</i> ; <i>M. intracellulare</i> ; <i>M. kansasii</i> ; <i>M. marseillense</i> ; <i>M. timonense</i>                                                                                                                                                                                                                                               | Positive                       |
| S106      | <i>M. chlorophenolicum</i> ; <i>M. chubuense</i> ; <i>M. flavescens</i> ; <i>M. komanii</i> ; <i>M. psychrotolerans</i>                                                                                                                                                                                                                                      | Positive                       |
| S101      | <i>M. flavescens</i> ; <i>M. komanii</i> ; <i>M. lehmannii</i> ; <i>M. neumannii</i> ; <i>M. novocastrense</i> ; <i>M. rutilum</i>                                                                                                                                                                                                                           | Negative                       |
| S105      | <i>M. flavescens</i> ; <i>M. komanii</i> ; <i>M. lehmannii</i> ; <i>M. neumannii</i> ; <i>M. novocastrense</i>                                                                                                                                                                                                                                               | Positive                       |
| S113      | <i>M. avium</i> ; <i>M. bouchedurhonense</i> ; <i>M. colombiense</i> ; <i>M. intracellulare</i> ; <i>M. vulneris</i>                                                                                                                                                                                                                                         | Positive                       |
| S115      | <i>M. avium</i> ; <i>M. branderi</i> ; <i>M. intracellulare</i> ; <i>M. kansasii</i> ; <i>M. kyorinense</i> ; <i>M. lacus</i> ; <i>M. szulgai</i> ; <i>M. tuberculosis</i> *                                                                                                                                                                                 | Negative                       |

\* MTBC members were identified by *hsp* 65 or *rpoB* amplification, but RD PCR (Warren et al 2001) showed that mycobacteria in the cultures were not MTBC members

Table S3: Test results of Ultra and CMdirect assays performed on oronasal swab samples stored in PrimeStore MTM. The table also shows the results for mycobacterial cultures from saline oronasal swabs, and PCR and Sanger sequencing with *hsp* 65, *rpoB*, *esat* -6 and *cfp* -10 primers performed on these samples from 120 buffaloes.

| Animal ID | PrimeStore MTM oronasal swab samples |                                         | Mycobacterial cultures from saline oronasal swab samples |               |             |                                      |                      |                |
|-----------|--------------------------------------|-----------------------------------------|----------------------------------------------------------|---------------|-------------|--------------------------------------|----------------------|----------------|
|           | Xpert MTB/RIF Ultra                  | Genotype CMdirect                       | Mycobacterial culture (MGIT)                             | NTM present   |             | Unidentifiable mycobacterial species | RD1 sequence matches |                |
|           |                                      |                                         |                                                          | <i>hsp</i> 65 | <i>rpoB</i> |                                      | <i>ESAT</i> - 6      | <i>CFP</i> -10 |
| S1        | MTB not detected                     | Negative                                | Positive                                                 | N/A           | N/A         | Yes                                  | Negative             | Negative       |
| S2        | MTB not detected                     | <i>M. fortuitum</i>                     | Positive                                                 | Negative      | Negative    |                                      | Negative             | Negative       |
| S3        | MTB not detected                     | <i>Mycobacterial species</i>            | Positive                                                 | Positive      | Negative    |                                      | Negative             | Negative       |
| S4        | MTB not detected                     | <i>M. fortuitum</i>                     | Positive                                                 | Negative      | Negative    |                                      | Negative             | Negative       |
| S5        | MTB not detected                     | Negative                                | Positive                                                 | N/A           | N/A         | Yes                                  | Negative             | Positive       |
| S6        | MTB not detected                     | Negative                                | Positive                                                 | Positive      | Negative    | Yes                                  | Negative             | Negative       |
| S7        | MTB not detected                     | Negative                                | Positive                                                 | Negative      | Negative    |                                      | Negative             | Negative       |
| S8        | MTB not detected                     | <i>M. fortuitum</i>                     | Positive                                                 | Positive      | Positive    |                                      | Negative             | Negative       |
| S9        | MTB not detected                     | Negative                                | Positive                                                 | N/A           | N/A         | Yes                                  | Negative             | Positive       |
| S10       | MTB not detected                     | Negative                                | Positive                                                 | Positive      | Negative    |                                      | Negative             | Negative       |
| S11       | MTB not detected                     | <i>M. szulgai</i>                       | Positive                                                 | Positive      | Positive    |                                      | Negative             | Negative       |
| S12       | MTB not detected                     | <i>Mycobacterial species</i>            | Positive                                                 | Negative      | Negative    |                                      | Negative             | Negative       |
| S13       | MTB not detected                     | <i>M. szulgai</i>                       | Positive                                                 | N/A           | N/A         | Yes                                  | Negative             | Positive       |
| S14       | MTB not detected                     | <i>M. fortuitum</i>                     | Positive                                                 | N/A           | N/A         | Yes                                  | Negative             | Positive       |
| S15       | MTB trace detected                   | <i>M. fortuitum</i> ; <i>M. szulgai</i> | Positive                                                 | N/A           | N/A         | Yes                                  | Negative             | Negative       |
| S16       | MTB not detected                     | <i>M. fortuitum</i>                     | Negative                                                 | N/A           | N/A         |                                      | N/A                  | N/A            |
| S17       | MTB not detected                     | <i>Mycobacterial species</i>            | Negative                                                 | N/A           | N/A         |                                      | N/A                  | N/A            |
| S18       | MTB not detected                     | <i>M. szulgai</i>                       | Positive                                                 | Positive      | Positive    |                                      | Positive             | Positive       |
| S19       | MTB not detected                     | <i>M. fortuitum</i>                     | Negative                                                 | N/A           | N/A         |                                      | N/A                  | N/A            |
| S20       | MTB not detected                     | <i>M. fortuitum</i> ; <i>M. szulgai</i> | Positive                                                 | Negative      | Negative    |                                      | Negative             | Positive       |
| S21       | MTB not detected                     | <i>M. fortuitum</i>                     | Positive                                                 | Positive      | Positive    |                                      | Positive             | Positive       |
| S22       | MTB not detected                     | <i>Mycobacterial species</i>            | Positive                                                 | Positive      | Positive    |                                      | Negative             | Negative       |
| S23       | MTB not detected                     | <i>Mycobacterial species</i>            | Positive                                                 | Positive      | Negative    |                                      | Negative             | Negative       |
| S24       | MTB not detected                     | <i>M. fortuitum</i>                     | Positive                                                 | Positive      | Positive    |                                      | Negative             | Positive       |
| S25       | MTB not detected                     | Invalid                                 | Positive                                                 | Negative      | Negative    |                                      | Negative             | Positive       |
| S26       | MTB not detected                     | <i>M. fortuitum</i>                     | Positive                                                 | Positive      | Positive    |                                      | Negative             | Positive       |

|     |                  |                                        |          |          |          |     |          |          |
|-----|------------------|----------------------------------------|----------|----------|----------|-----|----------|----------|
| S27 | MTB not detected | <i>M. fortuitum</i>                    | Negative | N/A      | N/A      |     | N/A      | N/A      |
| S28 | MTB not detected | <i>M. fortuitum</i>                    | Positive | Negative | Negative |     | Negative | Negative |
| S29 | MTB not detected | <i>M. fortuitum</i>                    | Positive | Negative | Negative |     | Negative | Negative |
| S30 | MTB not detected | <i>M. fortuitum</i>                    | Positive | Negative | Negative |     | Negative | Negative |
| S31 | MTB not detected | <i>Mycobacterial species</i>           | Positive | Positive | Negative |     | Negative | Positive |
| S32 | MTB not detected | <i>M. fortuitum</i>                    | Positive | Negative | Negative |     | Negative | Positive |
| S33 | MTB not detected | <i>M. fortuitum; M. intracellulare</i> | Positive | Negative | Negative |     | Negative | Negative |
| S34 | MTB not detected | <i>M. fortuitum</i>                    | Positive | N/A      | N/A      | Yes | Negative | Positive |
| S35 | MTB not detected | <i>Mycobacterial species</i>           | Positive | Negative | Negative |     | Negative | Negative |
| S36 | MTB not detected | <i>M. fortuitum; M. szulgai</i>        | Positive | Negative | Negative |     | Negative | Negative |
| S37 | MTB not detected | <i>M. fortuitum</i>                    | Positive | Negative | Negative |     | Negative | Negative |
| S38 | MTB not detected | <i>Mycobacterial species</i>           | Positive | Positive | Negative |     | Negative | Positive |
| S39 | MTB not detected | <i>Mycobacterial species</i>           | Positive | Positive | Negative |     | Negative | Positive |
| S40 | MTB not detected | <i>Mycobacterial species</i>           | Positive | Positive | Negative |     | Negative | Negative |
| S41 | MTB not detected | <i>M. interjectum</i>                  | Positive | N/A      | N/A      | Yes | Negative | Negative |
| S42 | MTB not detected | <i>M. fortuitum</i>                    | Positive | N/A      | N/A      | Yes | Negative | Positive |
| S43 | MTB not detected | <i>M. fortuitum</i>                    | Positive | Negative | Negative |     | Negative | Positive |
| S44 | MTB not detected | <i>M. fortuitum; M. malmoeense</i>     | Positive | Negative | Negative |     | Negative | Negative |
| S45 | MTB not detected | <i>M. szulgai</i>                      | Positive | Negative | Negative |     | Negative | Positive |
| S46 | MTB not detected | <i>M. fortuitum; M. kansasii</i>       | Positive | N/A      | N/A      | Yes | Negative | Negative |
| S47 | MTB not detected | <i>M. fortuitum; M. interjectum</i>    | Positive | Positive | Negative |     | Negative | Positive |
| S48 | MTB not detected | <i>M. fortuitum; M. interjectum</i>    | Positive | N/A      | N/A      | Yes | Negative | Positive |
| S49 | MTB not detected | <i>M. fortuitum; M. interjectum</i>    | Positive | Negative | Negative |     | Negative | Positive |
| S50 | MTB not detected | <i>Mycobacterial species</i>           | Positive | Negative | Negative |     | Negative | Positive |
| S51 | MTB not detected | <i>Mycobacterial species</i>           | Positive | N/A      | N/A      | Yes | Negative | Negative |
| S52 | MTB not detected | <i>M. interjectum</i>                  | Positive | Negative | Negative |     | Negative | Negative |
| S53 | MTB not detected | <i>M. interjectum</i>                  | Positive | N/A      | N/A      | Yes | Negative | Positive |
| S54 | MTB not detected | <i>Mycobacterial species</i>           | Positive | Negative | Negative |     | Negative | Negative |
| S55 | MTB not detected | <i>M. fortuitum</i>                    | Positive | Positive | Negative |     | Negative | Negative |
| S56 | MTB not detected | <i>M. interjectum</i>                  | Positive | Negative | Negative |     | Negative | Negative |
| S57 | MTB not detected | <i>M. szulgai</i>                      | Positive | Negative | Negative |     | Negative | Negative |

|     |                    |                                                                       |          |          |          |     |          |          |
|-----|--------------------|-----------------------------------------------------------------------|----------|----------|----------|-----|----------|----------|
| S58 | MTB not detected   | <i>M. chelonae; M. interjectum</i>                                    | Positive | Negative | Negative |     | Negative | Negative |
| S59 | MTB trace detected | <i>M. fortuitum; M. intracellulare; M. interjectum; M. malmoeense</i> | Positive | N/A      | N/A      | Yes | Negative | Positive |
| S60 | MTB not detected   | <i>M. fortuitum; M. szulgai</i>                                       | Positive | Negative | Negative |     | Negative | Negative |
| S61 | MTB not detected   | <i>Mycobacterial species</i>                                          | Positive | Positive | Negative |     | Negative | Positive |
| S62 | MTB not detected   | Negative                                                              | Positive | N/A      | N/A      | Yes | Negative | Negative |
| S63 | MTB not detected   | <i>M. fortuitum</i>                                                   | Positive | N/A      | N/A      | Yes | Negative | Negative |
| S64 | MTB not detected   | <i>M. fortuitum</i>                                                   | Positive | Positive | Negative |     | Negative | Negative |
| S65 | MTB not detected   | <i>M. fortuitum</i>                                                   | Positive | Positive | Negative |     | Negative | Negative |
| S66 | MTB not detected   | Negative                                                              | Positive | Negative | Negative |     | Negative | Positive |
| S67 | MTB not detected   | <i>Mycobacterial species</i>                                          | Positive | Negative | Negative |     | Negative | Negative |
| S68 | MTB not detected   | <i>M. fortuitum</i>                                                   | Positive | Negative | Negative |     | Negative | Negative |
| S69 | MTB not detected   | Negative                                                              | Positive | Positive | Negative |     | Negative | Negative |
| S70 | MTB trace detected | <i>M. fortuitum</i>                                                   | Positive | Negative | Negative |     | Negative | Negative |
| S71 | MTB not detected   | <i>Mycobacterial species</i>                                          | Positive | N/A      | N/A      | Yes | Negative | Positive |
| S72 | MTB trace detected | <i>M. fortuitum</i>                                                   | Positive | Negative | Negative |     | Negative | Negative |
| S73 | MTB not detected   | <i>Mycobacterial species</i>                                          | Positive | Negative | Negative |     | Negative | Positive |
| S74 | MTB not detected   | <i>M. fortuitum; M. szulgai</i>                                       | Positive | N/A      | N/A      | Yes | Negative | Positive |
| S75 | MTB not detected   | <i>Mycobacterial species</i>                                          | Positive | N/A      | N/A      | Yes | Negative | Positive |
| S76 | MTB not detected   | <i>M. kansasii; M. malmoeense</i>                                     | Negative | N/A      | N/A      |     | N/A      | N/A      |
| S77 | MTB not detected   | Negative                                                              | Negative | N/A      | N/A      |     | N/A      | N/A      |
| S78 | MTB not detected   | <i>Mycobacterial species</i>                                          | Positive | Negative | Negative |     | Negative | Negative |
| S79 | MTB not detected   | <i>M. abscessus; M. fortuitum</i>                                     | Positive | Positive | Positive |     | Negative | Negative |
| S80 | MTB not detected   | <i>Mycobacterial species</i>                                          | Positive | Positive | Positive |     | Negative | Positive |
| S81 | MTB trace detected | <i>M. fortuitum</i>                                                   | Negative | N/A      | N/A      |     | N/A      | N/A      |
| S82 | MTB not detected   | Invalid                                                               | Positive | Negative | Negative |     | Negative | Negative |
| S83 | MTB not detected   | <i>M. fortuitum; M. szulgai</i>                                       | Positive | Positive | Positive |     | Positive | Negative |
| S84 | MTB trace detected | <i>Mycobacterial species</i>                                          | Positive | Positive | Negative |     | Negative | Negative |
| S85 | MTB not detected   | <i>Mycobacterial species</i>                                          | Negative | N/A      | N/A      |     | N/A      | N/A      |
| S86 | MTB not detected   | <i>M. kansasii</i>                                                    | Positive | Positive | Positive |     | Positive | Positive |
| S87 | MTB not detected   | <i>M. fortuitum; M. gordonae</i>                                      | Positive | Negative | Negative |     | Negative | Negative |

|      |                    |                                              |          |          |          |     |          |          |
|------|--------------------|----------------------------------------------|----------|----------|----------|-----|----------|----------|
| S88  | MTB not detected   | <i>M. interjectum</i> ; <i>M. malmoeense</i> | Positive | N/A      | N/A      | Yes | Negative | Positive |
| S89  | MTB not detected   | Negative                                     | Positive | Positive | Positive |     | Negative | Positive |
| S90  | MTB trace detected | Mycobacterial species                        | Positive | N/A      | N/A      | Yes | Negative | Negative |
| S91  | MTB trace detected | <i>M. interjectum</i>                        | Positive | N/A      | N/A      | Yes | Negative | Positive |
| S92  | MTB not detected   | <i>M. fortuitum</i>                          | Positive | N/A      | N/A      | Yes | Negative | Positive |
| S93  | MTB not detected   | Mycobacterial species                        | Positive | N/A      | N/A      | Yes | Negative | Positive |
| S94  | MTB not detected   | <i>M. interjectum</i>                        | Positive | Positive | Positive |     | Negative | Positive |
| S95  | MTB not detected   | <i>M. fortuitum</i> ; <i>M. interjectum</i>  | Positive | N/A      | N/A      | Yes | Negative | Positive |
| S96  | MTB not detected   | Mycobacterial species                        | Positive | N/A      | N/A      | Yes | Negative | Positive |
| S97  | MTB trace detected | Mycobacterial species                        | Positive | N/A      | N/A      | Yes | Negative | Negative |
| S98  | MTB not detected   | <i>M. fortuitum</i> ; <i>M. interjectum</i>  | Positive | N/A      | N/A      | Yes | Negative | Positive |
| S99  | MTB trace detected | <i>M. interjectum</i>                        | Positive | Negative | Negative |     | Negative | Negative |
| S100 | MTB not detected   | <i>M. fortuitum</i>                          | Positive | Negative | Negative |     | Negative | Positive |
| S101 | MTB not detected   | <i>M. interjectum</i>                        | Positive | Positive | Negative |     | Negative | Negative |
| S102 | MTB trace detected | Mycobacterial species                        | Positive | Positive | Positive |     | Negative | Positive |
| S103 | MTB trace detected | Invalid                                      | Positive | Positive | Negative |     | Negative | Negative |
| S104 | MTB not detected   | <i>M. szulgai</i>                            | Positive | N/A      | N/A      | Yes | Negative | Positive |
| S105 | MTB not detected   | <i>M. fortuitum</i> ; <i>M. interjectum</i>  | Positive | Positive | Positive |     | Negative | Positive |
| S106 | MTB trace detected | <i>M. interjectum</i>                        | Positive | Positive | Negative |     | Negative | Positive |
| S107 | MTB not detected   | <i>M. interjectum</i>                        | Positive | Negative | Negative |     | Negative | Positive |
| S108 | MTB not detected   | <i>M. fortuitum</i> ; <i>M. interjectum</i>  | Positive | N/A      | N/A      | Yes | Negative | Positive |
| S109 | MTB not detected   | <i>M. fortuitum</i>                          | Positive | N/A      | N/A      | Yes | Negative | Positive |
| S110 | MTB not detected   | <i>M. fortuitum</i> ; <i>M. interjectum</i>  | Positive | N/A      | N/A      | Yes | Negative | Positive |
| S111 | MTB not detected   | <i>M. interjectum</i>                        | Positive | Positive | Negative |     | Negative | Positive |
| S112 | MTB not detected   | Mycobacterial species                        | Positive | Negative | Negative |     | Negative | Negative |
| S113 | MTB not detected   | <i>M. fortuitum</i> ; <i>M. interjectum</i>  | Positive | Positive | Positive |     | Negative | Positive |
| S114 | MTB not detected   | <i>M. fortuitum</i>                          | Positive | N/A      | N/A      | Yes | Negative | Positive |
| S115 | MTB trace detected | Mycobacterial species                        | Positive | Positive | Negative |     | Negative | Negative |
| S116 | MTB not detected   | Mycobacterial species                        | Positive | N/A      | N/A      | Yes | Negative | Positive |
| S117 | MTB not detected   | <i>M. fortuitum</i> ; <i>M. szulgai</i>      | Positive | Negative | Negative |     | Negative | Positive |

|                |                  |                              |          |          |          |     |          |          |
|----------------|------------------|------------------------------|----------|----------|----------|-----|----------|----------|
| S118           | MTB not detected | <i>M. szulgai</i>            | Positive | Positive | Positive |     | Negative | Positive |
| S119           | MTB not detected | <i>Mycobacterial species</i> | Positive | N/A      | N/A      | Yes | Negative | Negative |
| S120           | MTB not detected | <i>M. interjectum</i>        | Positive | Negative | Negative |     | Negative | Negative |
| Total positive | 14               | 106                          | 112      | 36       | 36       |     | 4        | 56       |



Table S4: Mycobacterial sequence matches in buffalo tissue (n = 6) and bronchoalveolar lavage fluid (n = 6) cultures using *hsp* 65 PCR and Sanger sequencing. Samples with BLASTn sequence matches < 90% were defined as having an unidentifiable mycobacterial species

| Mycobacterial species                | Tissue culture |     |     |     |     |     | Bronchoalveolar lavage fluid culture |     |     |     |     |     |
|--------------------------------------|----------------|-----|-----|-----|-----|-----|--------------------------------------|-----|-----|-----|-----|-----|
|                                      | TC1            | TC2 | TC3 | TC4 | TC5 | TC6 | LC1                                  | LC2 | LC3 | LC4 | LC5 | LC6 |
| <i>M. alvei</i>                      |                |     |     |     |     |     |                                      |     |     |     |     | X   |
| <i>M. avium</i>                      | X              | X   | X   | X   |     |     |                                      |     | X   | X   |     |     |
| <i>M. bouchedurhonense</i>           | X              |     |     |     |     |     |                                      |     |     |     |     |     |
| <i>M. colombiense</i>                | X              | X   | X   | X   |     |     |                                      |     | X   | X   |     |     |
| <i>M. europaeum</i>                  |                |     |     |     |     |     | X                                    | X   |     |     |     |     |
| <i>M. fortuitum</i>                  |                |     |     |     |     |     |                                      |     |     |     | X   | X   |
| <i>M. goodii</i>                     |                |     |     |     |     |     |                                      |     |     |     | X   |     |
| <i>M. houstonense</i>                |                |     |     |     |     |     |                                      |     |     |     |     | X   |
| <i>M. intracellulare</i>             | X              | X   | X   | X   |     |     |                                      |     | X   | X   |     |     |
| <i>M. paraense</i>                   |                | X   |     |     |     |     |                                      |     |     |     |     |     |
| <i>M. parascrofulaceum</i>           |                |     |     |     |     |     | X                                    | X   |     |     |     |     |
| <i>M. parmense</i>                   |                | X   |     | X   |     |     |                                      |     |     |     |     |     |
| <i>M. peregrinum</i>                 |                |     |     |     |     |     |                                      |     |     |     | X   |     |
| <i>M. piscinum</i>                   |                |     |     |     |     |     |                                      |     |     |     | X   |     |
| <i>M. saskatchewanense</i>           |                |     |     |     |     |     | X                                    | X   |     |     |     |     |
| <i>M. scrofulaceum</i>               |                |     |     |     |     |     | X                                    | X   |     |     |     |     |
| <i>M. setense</i>                    |                |     |     |     |     |     |                                      |     |     |     |     | X   |
| <i>M. smegmatis</i>                  |                |     |     |     |     |     |                                      |     |     |     | X   |     |
| <i>M. szulgai</i>                    |                |     |     |     |     |     | X                                    | X   |     |     |     |     |
| <i>M. vulneris</i>                   | X              |     |     |     |     |     |                                      |     |     |     |     |     |
| <i>M. wolinskyi</i>                  |                |     |     |     |     |     |                                      |     |     |     |     | X   |
| Unidentifiable mycobacterial species |                |     |     |     | X   | X   |                                      |     |     |     |     |     |

TC 1-6 and LC 1-6 are the sample numbers from tissue cultures and BALF cultures, respectively
